# Supplementary material for: Celsr3 is required for Purkinje cell maturation and regulates cerebellar postsynaptic plasticity
Source: PubMed Central journal article supplement — iScience. 2021 Jul 1;24(7):102812. doi: 10.1016/j.isci.2021.102812 (PMC8283331; doi:10.1016/j.isci.2021.102812), 2021-07-01
Supplement: mmc1.pdf [file mmc1.pdf]

iScience, Volume 24

## **Supplemental information**

### **Celsr3 is required for Purkinje cell maturation and regulates cerebellar postsynaptic plasticity**

**Qinji Zhou, Jingwen Qin, Yaying Liang, Wei Zhang, Siyuan He, Fadel Tissir, Yibo Qu, and Libing Zhou**

## Supplementary materials

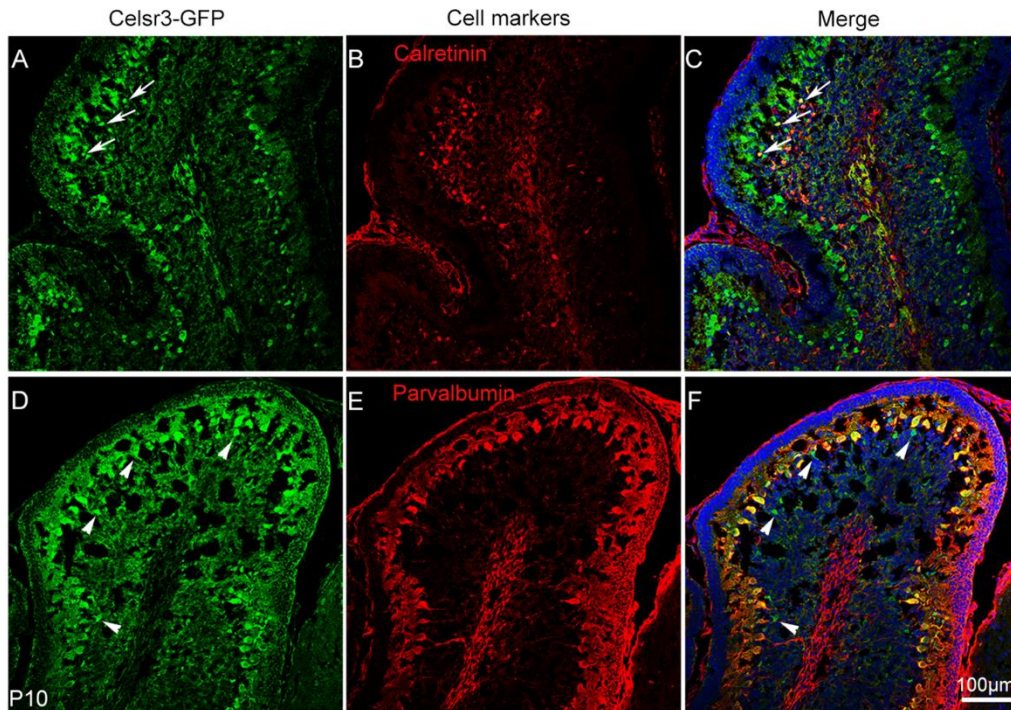

**Fig. S1 A few Calretinin-positive cerebellar cells express Celsr3, Related to Figure 1**

A-C: P10 cerebellar sections from *Celsr3*-GFP mice immunostained with anti-Calretinin (A, red) and anti-GFP antibodies (B, green). A few GFP-positive cells are positive for Calretinin (C, arrows).

D-F: In P10 sections, all Parvalbumin-positive PCs (red) co-express *Celsr3*-GFP (green), but some green cells below the PC layer are negative for Parvalbumin (arrowheads in E and F).

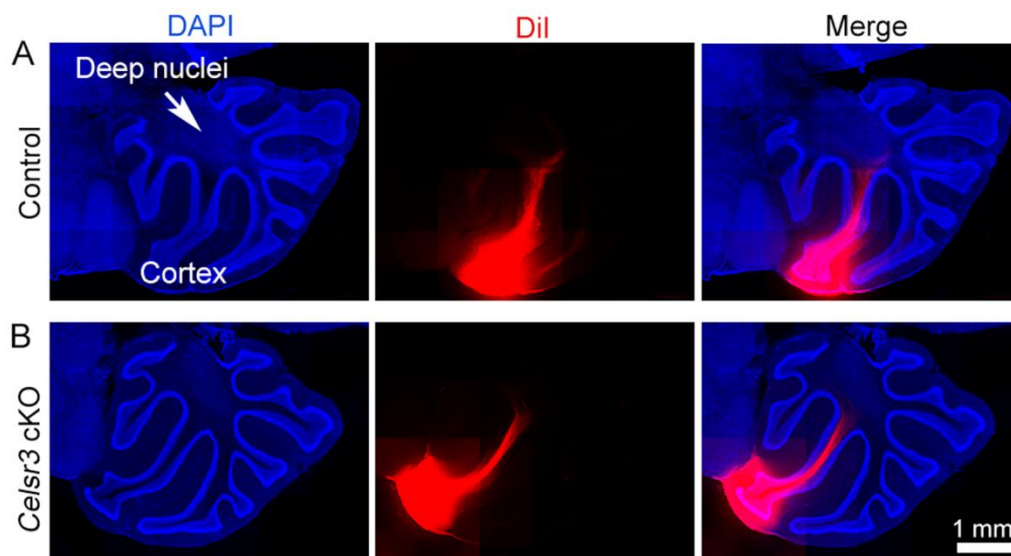

**Fig. S2 *Celsr3* cKO PCs have normal axonal projections, Related to Figure 3.**

Dil implantation into cerebellar cortex indistinguishably labels PC axons (red) projecting to cerebellar deep nuclei in control (A) and *Celsr3* cKO (B) animals. DAPI (blue) counterstained nuclei.

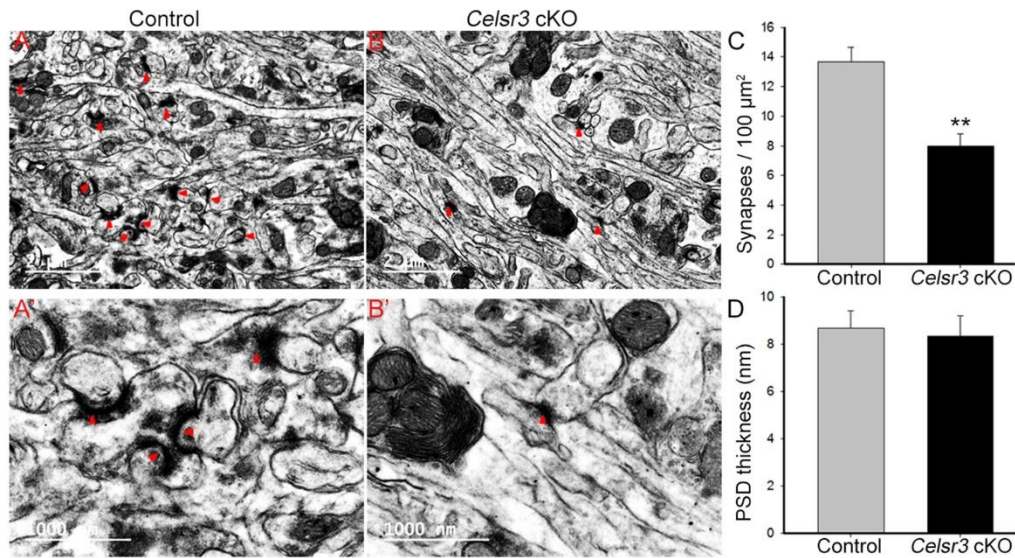

**Fig. S3 *Celsr3* cKO in PCs decreases synapse density in cerebellar cortex, Related to Figure 3.**

A, B: Ultrastructure of the molecular layer in adult control (A) and *Celsr3* cKO (B) cerebella, 13500x transmission electron microscopy. Red arrowheads indicate synapses.

A', B': Synapses (red arrowheads) at 35000x transmission electron microscopy in control (A') and *Celsr3* cKO (B').

C, D: Significant decrease of synapse density in the mutant compared to the control ( $7.9 \pm 0.85$  synapses/ $100 \mu\text{m}^2$  versus  $13.7 \pm 0.96$  synapses/ $100 \mu\text{m}^2$ ;  $n = 3$  animals in each group,  $P < 0.05$ ; Student's *t*-test). The thickness of post synapse density (PSD) is comparable in both genotypes ( $8.65 \pm 0.73 \text{ nm}$  in the control versus  $8.32 \pm 0.86 \text{ nm}$  in the mutant,  $n = 3$  animals in each group,  $P > 0.05$ ; Student's *t*-test).

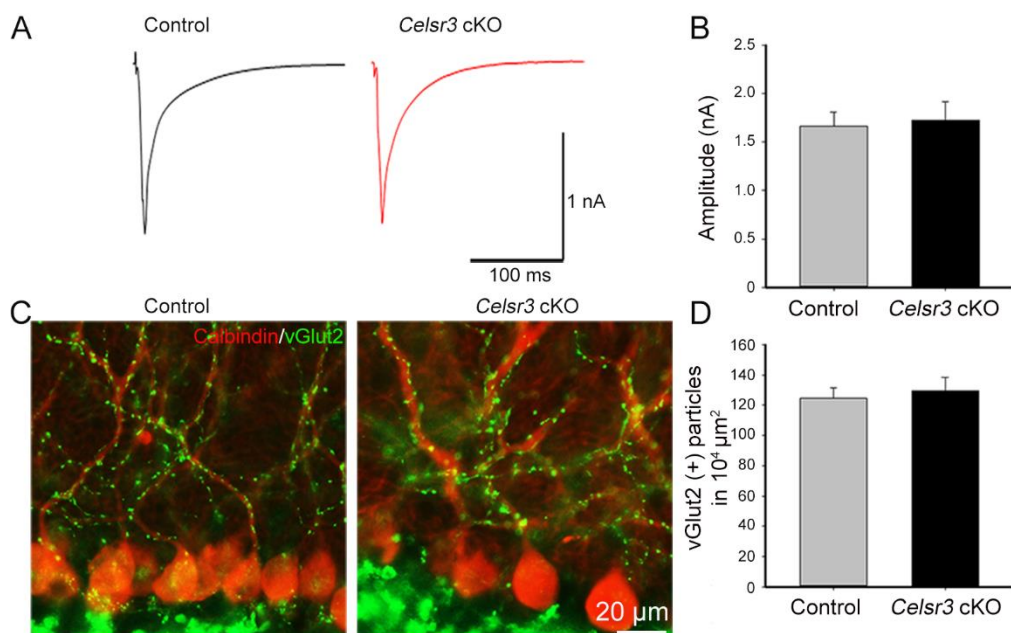

**Fig. S4 *Celsr3* cKO PCs have normal CF innervation and CF-PC EPSCs, Related to Figure 5.**

A: Representative traces of CF-PC EPSCs in control (black) and *Celsr3* cKO (red) mice.

B: The amplitude of CF-PC EPSC is comparable in two groups ( $1.66 \pm 0.15$  nA in the control versus  $1.72 \pm 0.19$  nA in the mutant;  $n = 4$  animals in each group;  $P > 0.05$ , Student's *t*-test).

C, D: In cerebellar sections, anti-Calbindin and -vGlut2 double fluorescent staining (C) showed that the density of vGlut2-positive particles on Calbindin-labelled dendrites were comparable in two groups (D;  $124.5 \pm 6.74/10^4 \mu\text{m}^2$  in the control versus  $129.7 \pm 8.7/10^4 \mu\text{m}^2$  in the mutant;  $n = 3$  animals in each group;  $P > 0.05$ , Student's *t*-test).

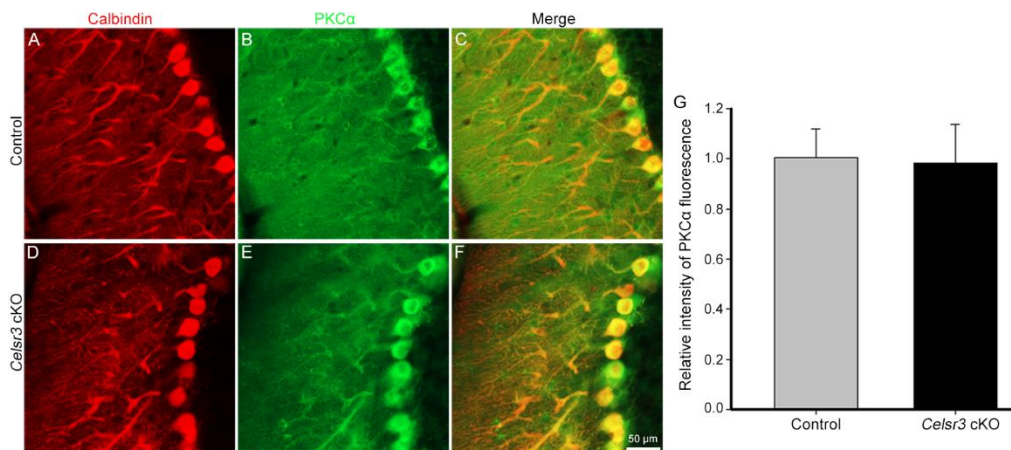

**Fig. S5 *Celsr3* cKO in PCs does not affect PKCα basal expression in the cerebella, Related to Figure 7.**

A-F: Cerebellar sections were performed for anti-Calbindin (A, D) and - PKCα (B, E) double fluorescent staining in the control (A-C) and the *Celsr3* cKO (D-F).

G: Statistic analysis showed that the relative fluorescent intensity of PKCα was comparable in two groups.  $P > 0.05$ ; Student's *t*-test;  $n = 3$  animals in each group.
